1 **LOW BACK PAIN IN COMPENSATED AUSTRALIAN**  
2 **WORKERS: A RETROSPECTIVE COHORT STUDY**

3 Michael Di Donato<sup>a</sup>, Rachelle Buchbinder<sup>b</sup>, Ross Iles<sup>a</sup>, Shannon Gray<sup>a</sup>, Alex Collie<sup>a</sup>

4

5 <sup>a</sup>: Insurance Work and Health Group, School of Public Health and Preventive Medicine,

6 Monash University, 553 St Kilda Road, Melbourne, Victoria 3004, Australia

7 <sup>b</sup>: Monash Department of Clinical Epidemiology, Cabrini Institute and Department of

8 Epidemiology, School of Public Health and Preventive Medicine, Monash University, 4

9 Drysdale St, Malvern, Victoria 3144, Australia.

10

11 **Corresponding author:** Mr Michael Di Donato

12 [michael.didonato@monash.edu](mailto:michael.didonato@monash.edu); +61 03 9905 6417

13 Insurance Work and Health Group, School of Public Health and Preventive Medicine,

14 Monash University, Melbourne, Australia.

15 553 St Kilda Road, Melbourne, Victoria, Australia.

16

17 **Word count (excluding title page, abstract, references, and tables):** 3,244

18

19 **Keywords:** low back pain; workers compensation; work disability;

20

21

## 22 **ABSTRACT**

### 23 **Objectives**

24 To describe incidence, duration, and patterns of working time loss claims in compensated  
25 Australian workers with low back pain (LBP), and compare this with other musculoskeletal  
26 conditions.

### 27 **Methods**

28 The National Dataset for Compensation-based Statistics (NDS) was used for this study. Any  
29 accepted workers' compensation time loss claims for LBP, limb fracture or limb soft tissue  
30 disease occurring between July 2010 and June 2015 were included. Demographic information,  
31 occupation, and total cumulative time loss data were extracted. Counts, rates per 10,000  
32 covered workers, the relative risk and median duration of time loss were calculated.

33 Multivariate Cox and quantile regression models were used to determine factors affecting  
34 time loss duration and patterns.

### 35 **Results**

36 There were 56,102 LBP claims, 42,957 limb fracture claims, and 18,249 limb soft tissue  
37 disease claims. The relative risk of a claim for LBP was significantly greater than limb  
38 fractures after adjustment for all covariates (RR 1.30, 95%CI 1.29 – 1.32,  $p < 0.001$ ). LBP  
39 claims had longer median time loss (9.39 weeks) than limb fracture claims (9.21 weeks).

40 Quantile regression demonstrated that LBP claims were more likely than limb fracture claims  
41 to resolve within seven weeks, and to persist for periods beyond seven weeks.

### 42 **Conclusions**

43 There were differential patterns of time loss in LBP claims and limb fracture claims. The  
44 interaction between conditions, and policies and practices may contribute to these patterns.

45 The findings should reiterate to workers' compensation stakeholders the importance of  
46 returning a worker to work as soon as practicable, to avoid future delays or challenges.

## 47 **KEY MESSAGES**

### 48 **What is already known about this subject?**

- 49 • LBP is a prevalent musculoskeletal symptom the leading contributor to the burden of  
50 disability for people of working age.
- 51 • Musculoskeletal conditions like LBP comprise the largest proportion of compensated  
52 conditions in Australia.

### 53 **What are the new findings?**

- 54 • The incidence of claims for work-related LBP is higher than other work-related  
55 musculoskeletal conditions.
- 56 • Median time loss associated with a claim for LBP is similar to time loss for a claim  
57 for a limb fracture but less than for limb soft tissue disease claims.
- 58 • The likelihood of time loss duration is greater for workers with claims LBP than  
59 claims for limb fracture in the short term (seven weeks), but lower than limb fracture  
60 claims after this time.

### 61 **How might this impact on policy or clinical practice in the foreseeable future?**

- 62 • Workers' compensation stakeholders including clinicians, insurers, and workers'  
63 compensation authorities should carefully consider the importance of returning a  
64 worker to work as soon as practicable to avoid future challenges, particularly for a  
65 condition as burdensome as LBP.

## 66 INTRODUCTION

67 Low back pain (LBP) is a prevalent musculoskeletal symptom and the leading contributor to  
68 the burden of disease.<sup>1-3</sup> Non-specific LBP typically has a favourable prognosis, with the  
69 majority of people with LBP recovering normal function within two weeks of pain onset.<sup>3,4</sup>  
70 However, LBP may be associated with activity limitation in the acute and even chronic  
71 setting.<sup>3, 5-7</sup> A large proportion of LBP sufferers are of working age.<sup>1-3</sup> A worker may seek  
72 wage replacement from an injury compensation or benefit system such as workers'  
73 compensation or social security (hereafter referred to as 'income support system') if they are  
74 unable to work due to LBP.<sup>8</sup>

75 In Australia, if a condition such as LBP is determined to be work-related, then the worker  
76 may be eligible for payment for lost wages from a workers' compensation scheme.<sup>9, 10</sup> Injury  
77 and musculoskeletal disorders constitute the majority of workers' compensation claims in  
78 Australia; 89% of serious claims in the 2016-17 financial year were for injuries and  
79 musculoskeletal disorders.<sup>11, 12</sup> During the same period body stressing in the upper and lower  
80 back were the most common mechanism and location of injury, respectively.

81 While there have been previous estimates of the incidence of compensated musculoskeletal  
82 disorders in Australia,<sup>12</sup> there are fewer estimates examining cases of work-related LBP  
83 specifically. Additionally, factors affecting compensated time loss have previously been  
84 estimated for musculoskeletal disorders more broadly, but not specifically for LBP in  
85 Australia.<sup>13-15</sup> Finally, comparisons of claim incidence and time loss between claims for LBP  
86 and other musculoskeletal conditions have rarely been made in published literature.

87 The objectives of this study were therefore to (1) Determine the incidence of compensated  
88 work-related LBP in Australia and compare that with the incidence of two other common  
89 compensated work-related musculoskeletal disorders - limb fracture and limb soft tissue

90 disease (muscle and tendon diseases); and (2) Determine and compare the duration of,  
91 patterns and factors affecting working time loss in compensated Australian workers with  
92 these three sets of conditions.

## 93 **METHODS**

### 94 **Data source**

95 This study used the National Dataset for Compensation-based Statistics (NDS). This  
96 administrative dataset is compiled by Safe Work Australia.<sup>16</sup> Each state and territory in  
97 Australia has its own workers' compensation scheme, and there are three Commonwealth  
98 (Federal) schemes.<sup>10</sup> These systems are cause-based; wage replacement is only provided to  
99 those where an injury or illness is "attributable to a specific employment-related cause".<sup>9, 10, 17,</sup>  
100 <sup>18</sup> Further description of the Australian workers' compensation setting is available  
101 elsewhere.<sup>9, 10</sup> These schemes provide data to Safe Work Australia to be collated in the NDS  
102 annually. The NDS contains claim-level data including: worker age, sex, occupation, industry,  
103 jurisdiction, socioeconomic status, remoteness, employment status, and cumulative time loss  
104 (reported in weeks). Safe Work Australia also supply a denominator dataset that contains the  
105 number of workers covered by workers' compensation insurance in a given year for each of  
106 sex, age, occupation, and jurisdiction. The NDS and denominator data have been used in  
107 several previous studies.<sup>19, 20</sup>

### 108 **Sample**

109 All accepted claims involving at least one day of compensated time away from work (i.e.,  
110 time loss claims) by workers who sustained work-related (1) low back pain, (2) limb fracture,  
111 and (3) muscle and tendon diseases between 1 July 2010 and 30 June 2015 (i.e., five  
112 Australian financial years) were included. Each of the three groups were defined using the  
113 Type of Occurrence Classification System (TOOCS) version 3 revision 1 (see appendix 1).<sup>21</sup>

114 The comparator groups were chosen as they represent musculoskeletal conditions that were  
115 hypothesised were likely to have different (limb fractures) and similar (muscle and tendon  
116 diseases) patterns of functional recovery and occupational outcomes compared to LBP.<sup>22, 23</sup>  
117 The sample included workers aged > 15 years and < 80 years. Claims were excluded if they  
118 contained unlikely weekly working hours prior to a claim (< 1 hour and > 100 hours). Claims  
119 with time-loss less than two weeks or greater than 365 weeks were excluded, and censor  
120 indicator marked the maximum duration of any one claim at 104 weeks' time loss (i.e., two  
121 years).<sup>19, 20, 24</sup> Filtering claims in this manner creates a standardised cohort across all  
122 jurisdictions. For example, some jurisdictions require an employer to pay the first 10 business  
123 days wage replacement (i.e., the two week filter), and each jurisdiction has a different  
124 maximum wage replacement period (i.e., censoring at 104 weeks, or two years). These  
125 eligibility criteria have been applied previously in studies using the NDS.<sup>19, 20, 24</sup> Application  
126 of these eligibility criteria is described in Figure 1.

### 127 **Outcome variables**

128 The primary outcome variables for this study were (1) the incidence of accepted workers'  
129 compensation time loss claims per 10,000 covered workers, and (2) duration of time loss for  
130 workers with accepted claims in weeks. These outcomes have been used in previous similar  
131 studies.<sup>19, 20, 24</sup>

### 132 **Independent variable**

133 Worker condition (i.e., LBP, limb fracture, or limb soft tissue disease) was the independent  
134 variable in analyses.

### 135 **Covariates**

136 Covariates were chosen based on past association with study outcomes in groups of workers  
137 with LBP and other musculoskeletal conditions and availability within the dataset.<sup>16, 19, 24</sup> Age

138 at the time of injury was reported as age group (15-24 years, 25-34 years, 35-44 years, 45-55  
139 years, and 55 > years), and sex reported in binary terms (male / female). Australian and New  
140 Zealand Classification of Occupations (ANZSCO) major codes were used to define eight  
141 major occupation groups.<sup>25</sup> Jurisdiction was defined as the workers' compensation  
142 jurisdiction in which the claim was accepted. Socioeconomic status was defined by the Index  
143 of Relative Socioeconomic Advantage and Disadvantage (IRSAD).<sup>26,27</sup> As per previous  
144 analyses, the middle three quintiles were collapsed, with the most advantaged and most  
145 disadvantaged quintiles at either extreme.<sup>24</sup> Accessibility / Remoteness Index of Australia  
146 (ARIA) provided five categories of remoteness.<sup>26,28</sup> Finally, workers were classified as full-  
147 time if they worked  $\geq 35$  hours per week, or part-time otherwise.

148 Portions of the IRSAD (8.54%), ARIA (8.43%), and ANZSCO (0.39%) variables had  
149 missing values. IRSAD and ARIA are both derived from postcode, likely leading to similar  
150 proportion of missing values. Multivariate Imputation by Chained Equations (MICE) was  
151 used to impute the missing variables. MICE was performed for 10 imputations with 20  
152 iterations of each imputation.<sup>29</sup>

## 153 **Analysis**

154 Descriptive statistics were first used to determine the counts of time loss claims for LBP and  
155 the comparator conditions for each covariate. Claim incidence was calculated for LBP and  
156 the comparator conditions for sex, age group, occupation and jurisdiction. Poisson regression  
157 was used to calculate the unadjusted relative risk of a claim for each condition. The  
158 covariates sex, age group, occupation, and jurisdiction were then added to an adjusted model.  
159 Other covariates were not included in Poisson regression as denominator data (i.e., total  
160 covered workers) were not available. The log of the total number of covered workers was  
161 used as an offset in Poisson regression.<sup>19</sup> Results were expressed as unadjusted and adjusted  
162 relative risk, with 95% confidence intervals (CI).

163 Descriptive statistics were used to determine the median and inter-quartile range (IQR) of  
164 time loss for LBP and the comparator conditions for all covariates. A Schoenfeld residual test  
165 indicated that the all conditions significantly violated the proportional hazards assumption.<sup>30</sup>

166 <sup>31</sup> A Cox proportional hazards model could therefore not be used to compare time loss  
167 between workers with LBP and the comparator conditions. However, to visualise the time  
168 loss differences between conditions a multivariate Cox model was created with the conditions  
169 as strata. This model was plotted as a survival curve, and demonstrated that workers with  
170 LBP and limb fractures appeared to have a fluctuating likelihood of cessation of time loss  
171 (i.e., a return to work) relative to one another (i.e., they were not proportional).

172 Quantile regression enabled a statistical comparison of time loss between LBP and the  
173 comparator conditions. A commonly used statistical method in econometrics, quantile  
174 regression performs regression within each of *tau* quantiles of the dependent variable, rather  
175 than across the entire dependent variable.<sup>32, 33</sup> This method is ideal for analyses where the  
176 outcome variable is highly skewed and outliers may substantially affect the mean.<sup>32, 33</sup> Both  
177 this analysis and other analyses of workers' compensation data have consistently described  
178 the skewed nature of time loss as an outcome.<sup>24, 34</sup> Quantile regression enables determination  
179 of how many weeks difference in time loss there are specific quantiles, and has also  
180 previously been used with this type of data<sup>34</sup>

181 Based on visualisation of time loss in the survival curves, the 10<sup>th</sup>, 25<sup>th</sup>, 50<sup>th</sup>, 75<sup>th</sup>, and 90<sup>th</sup>  
182 quantiles were selected *a priori*. Analyses were performed with the entire imputed dataset,  
183 with all covariates included, in R 3.5 (Vienna, Austria),<sup>35</sup> compiled in Microsoft Visual  
184 Studio 2017 (Redmond, USA).<sup>36</sup>

## 185 **Ethics**

186 This study received ethics approval from the Monash University Human Research Ethics  
187 Committee (MUHREC) (Approval No. CF14/2995–2014001663, January 2019).



## 188 **RESULTS**

### 189 **Incidence**

190 There were a greater number of claims for LBP (n=56,102) than limb fracture (n=42,957) and  
191 limb soft tissue disease (n=18,249) (see Table 1 and Figure 1). The incidence of claims for  
192 LBP was also higher than both comparator conditions at 9.37 per 10,000 covered workers  
193 (7.17 per 10,000 covered workers for limb fracture, and 3.05 per 10,000 covered workers  
194 limb soft tissue disease). The relative risk of a claim for LBP was significantly greater than  
195 for limb fractures (RR 1.31, 95% CI 1.29 – 1.32,  $p < 0.001$ ), and remained significant after  
196 adjustment for covariates (ARR 1.30, 95% CI 1.29 – 1.32,  $p < 0.001$ ; ARR 0.43, 95% CI 0.42  
197 – 0.44 for limb soft tissue disease).

198

199

200

201

202

203

204

205

206

207

208

209

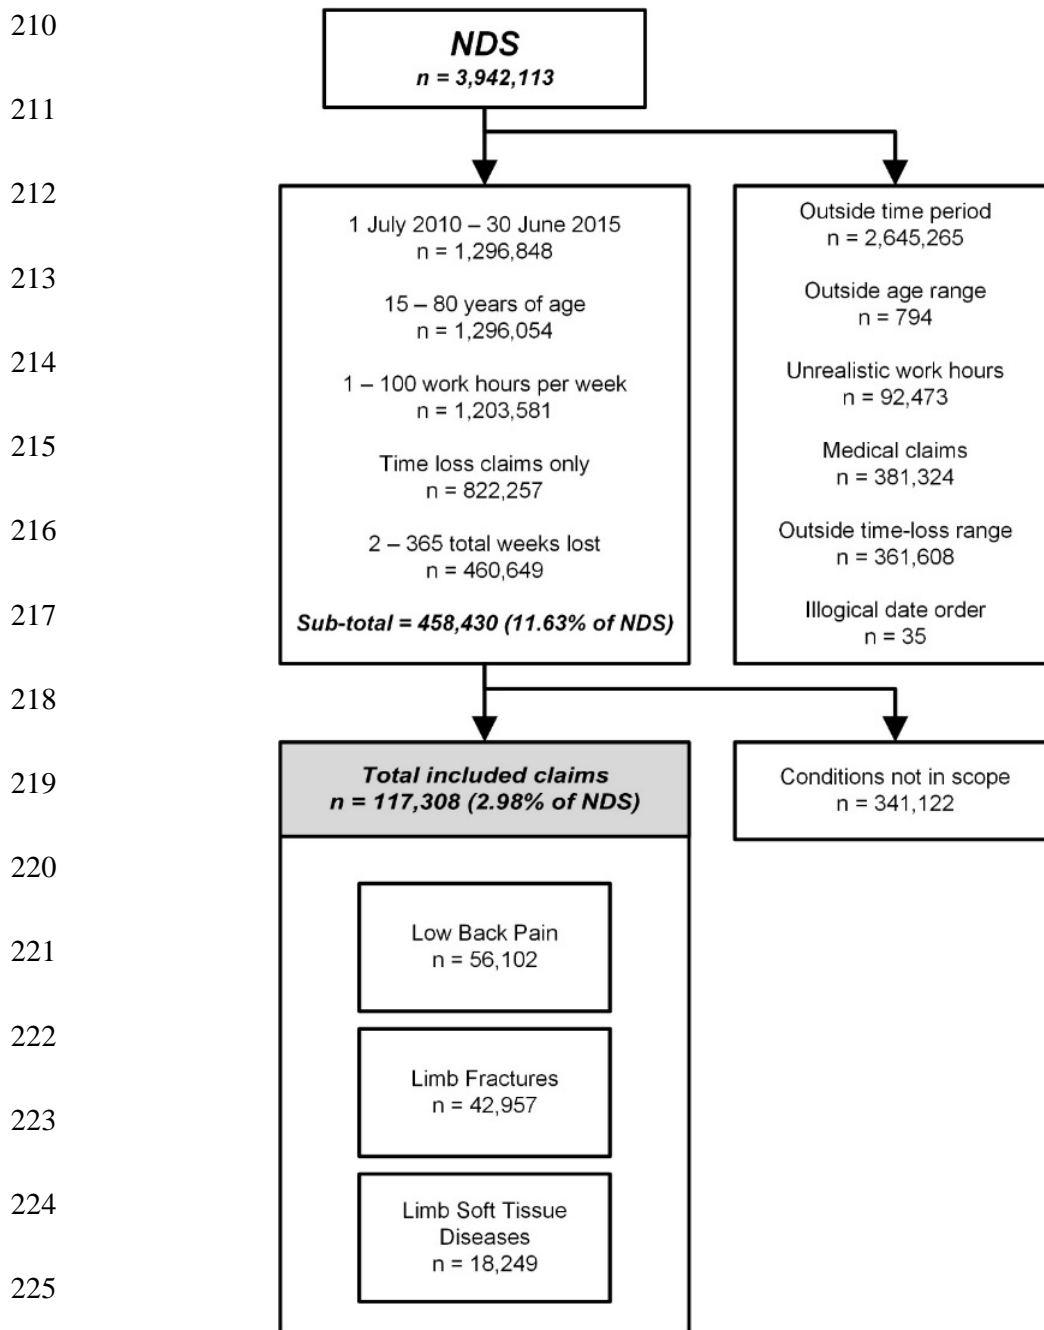

226 *Figure 1 Sample selection process and number of included claims (NDS = National Dataset*  
 227 *of Compensation-based Statistics)*

228

229 The incidence of claims was greater for males than females for LBP and limb fracture claims,

230 but there was a relatively small difference between sexes for limb soft tissue disease claims.

231 The incidence of claims in all three condition groups generally increased with age, but the

232 trend was most noticeable in LBP claims. More physically demanding occupations had a  
233 significantly greater incidence of claims for all conditions, and increased relative risk in the  
234 adjusted model. This was most notable for LBP claims, with *Machinery Operators and*  
235 *Drivers and Labourers* claiming for LBP at a rate of 23.6 and 22.7 per 10,000 covered  
236 workers, respectively.

237 The highest incidence of claims per jurisdiction was for LBP in Queensland (12.2 per 10,000  
238 covered workers). However, other jurisdictions had relatively similar rates of LBP claims at  
239 8.8 to 11.3 per 10,000 covered workers. The incidence of claims for limb fracture and limb  
240 soft tissue disease were lower, with limb soft tissue disease claims as low as 0.6 per 10,000  
241 covered workers in Western Australia (WA).

#### 242 **Time loss**

243 Median time loss for LBP (9.39 weeks, IQR 3.95 – 30.2) and limb fractures (9.22 weeks, IQR  
244 5.07 – 19.30) were similar, despite a more right-skewed 75<sup>th</sup> percentile for LBP (see Table 2).  
245 The median time loss for limb soft tissue disease claims was greater at 14.40 weeks (IQR  
246 5.92 – 40.4). A relatively large proportion of claims for LBP had a short duration of time loss  
247 (see Figure 2A). However, numerous claims lasted for a greater duration, extending the 75<sup>th</sup>  
248 percentile. The majority of limb fracture claim time loss appeared to cluster closer to the  
249 median, with only a relatively small proportion of outliers. The distribution of time loss for  
250 limb soft tissue disease claims did not appear to follow a specific trend.

251

Table 1 Incidence and relative risk of claims for included conditions between 01 July 2010 and 30 June 2015

| Parameter                     |                                        | Low Back Pain |                   | Limb Fracture |       | Limb Soft Tissue Disease |      | Covered Workers <sup>2</sup> | Adjusted Relative Risk Model |             |           |
|-------------------------------|----------------------------------------|---------------|-------------------|---------------|-------|--------------------------|------|------------------------------|------------------------------|-------------|-----------|
|                               |                                        | n             | Rate <sup>1</sup> | n             | Rate  | n                        | Rate |                              | ARR <sup>3</sup>             | 95%CI       | p         |
| Condition                     | Limb Fracture                          | -             | -                 | 42,957        | 7.17  | -                        | -    | 59,888,198                   | 1                            | 1           | Reference |
|                               | Low Back Pain                          | 56,102        | 9.37              |               |       |                          |      | 59,888,198                   | 1.30                         | 1.29 - 1.32 | p < 0.001 |
|                               | Limb Soft Tissue Disease               | -             |                   | -             |       | 18,249                   | 3.05 | 59,888,198                   | 0.43                         | 0.42 - 0.44 | p < 0.001 |
| Sex                           | Female                                 | 20,881        | 7.26              | 13,989        | 4.86  | 8,559                    | 2.98 | 28,760,088                   | 1                            | 1           | Reference |
|                               | Male                                   | 35,221        | 11.31             | 28,968        | 9.31  | 9,690                    | 3.11 | 31,128,110                   | 1.13                         | 1.12 - 1.15 | p < 0.001 |
| Age Group                     | 15-24 years                            | 5,430         | 4.91              | 6,728         | 6.08  | 945                      | 0.85 | 11,061,004                   | 1                            | 1           | Reference |
|                               | 25-34 years                            | 12,378        | 8.80              | 8,808         | 6.26  | 2,325                    | 1.65 | 14,069,862                   | 1.76                         | 1.72-1.79   | p<0.001   |
|                               | 35-44 years                            | 14,587        | 11.13             | 8,405         | 6.41  | 4,366                    | 3.33 | 13,107,972                   | 2.27                         | 2.23-2.32   | p<0.001   |
|                               | 45-55 years                            | 14,740        | 11.80             | 9,591         | 7.68  | 6,256                    | 5.01 | 12,488,294                   | 2.57                         | 2.52-2.63   | p<0.001   |
|                               | 55+ years                              | 8,967         | 9.79              | 9,425         | 10.29 | 4,357                    | 4.76 | 9,161,066                    | 2.53                         | 2.48-2.59   | p<0.001   |
| Occupation<br>(n=453 missing) | Managers                               | 2,286         | 3.42              | 2,275         | 3.41  | 664                      | 0.99 | 6,679,548                    | 1                            | 1           | Reference |
|                               | Professionals                          | 5,203         | 3.89              | 4,210         | 3.15  | 1,645                    | 1.23 | 13,370,711                   | 1.12                         | 1.08-1.16   | p<0.001   |
|                               | Technicians and Trades Workers         | 9,114         | 11.35             | 8,912         | 11.10 | 2,859                    | 3.56 | 8,028,117                    | 3.66                         | 3.55-3.78   | p<0.001   |
|                               | Community and Personal Service Workers | 10,148        | 15.73             | 4,949         | 7.67  | 2,648                    | 4.11 | 6,450,526                    | 4.20                         | 4.07-4.34   | p<0.001   |
|                               | Clerical and Administrative Workers    | 2,055         | 2.32              | 2,293         | 2.58  | 1,035                    | 1.17 | 8,875,079                    | 0.85                         | 0.82-0.88   | p<0.001   |
|                               | Sales Workers                          | 3,689         | 5.81              | 2,122         | 3.34  | 1,564                    | 2.46 | 6,352,551                    | 1.99                         | 1.92-2.07   | p<0.001   |
|                               | Machinery Operators and Drivers        | 9,298         | 23.63             | 6,791         | 17.26 | 2,558                    | 6.50 | 3,934,029                    | 5.93                         | 5.75-6.12   | p<0.001   |
|                               | Labourers                              | 14,068        | 22.70             | 11,266        | 18.18 | 5,203                    | 8.40 | 6,197,637                    | 7.09                         | 6.89-7.3    | p<0.001   |
| Jurisdiction                  | New South Wales                        | 14,071        | 7.49              | 12,697        | 6.76  | 3,030                    | 1.61 | 18,777,437                   | 1                            | 1           | Reference |
|                               | Victoria                               | 13,460        | 8.79              | 8,440         | 5.51  | 8,561                    | 5.59 | 15,308,654                   | 1.25                         | 1.23-1.27   | p<0.001   |
|                               | Queensland                             | 14,512        | 12.22             | 11,332        | 9.54  | 4,133                    | 3.48 | 11,876,742                   | 1.46                         | 1.44-1.48   | p<0.001   |
|                               | South Australia                        | 4,849         | 11.31             | 2,618         | 6.11  | 1,518                    | 3.54 | 4,287,409                    | 1.24                         | 1.21-1.27   | p<0.001   |
|                               | Western Australia                      | 6,790         | 9.76              | 5,707         | 8.20  | 429                      | 0.62 | 6,956,567                    | 1.10                         | 1.08-1.13   | p<0.001   |
|                               | Tasmania                               | 1,380         | 11.03             | 926           | 7.40  | 245                      | 1.96 | 1,251,057                    | 1.15                         | 1.11-1.2    | p<0.001   |
|                               | Northern Territory                     | 465           | 6.48              | 771           | 10.75 | 74                       | 1.03 | 717,458                      | 1.18                         | 1.12-1.25   | p<0.001   |
|                               | Australian Capital Territory Private   | 575           | 8.07              | 466           | 6.54  | 259                      | 3.63 | 712,874                      | 1.36                         | 1.29-1.44   | p<0.001   |
| SES (n=10,016 missing)        | Middle three quintiles                 | 8,887         |                   | 6,560         |       | 2,845                    |      |                              |                              |             |           |
|                               | Most advantaged quintile               | 33,706        |                   | 25,484        |       | 10,292                   |      |                              |                              |             |           |
|                               | Most disadvantaged quintile            | 8,800         |                   | 8,025         |       | 2,693                    |      |                              |                              |             |           |
| Remoteness                    | Major Cities of Australia              | 34,550        |                   | 26,457        |       | 10,829                   |      |                              |                              |             |           |

|                   |                          |        |        |        |
|-------------------|--------------------------|--------|--------|--------|
| (n=9,886 missing) | Inner Regional Australia | 10,798 | 8,177  | 3,554  |
|                   | Outer Regional Australia | 5,316  | 4,297  | 1,329  |
|                   | Remote Australia         | 571    | 769    | 90     |
|                   | Very Remote Australia    | 211    | 428    | 46     |
| Employment Status | Full-time                | 42,081 | 33,447 | 13,192 |
|                   | Part-time                | 14,021 | 9,510  | 5,057  |

253 <sup>1</sup>: Rate per 10,000 covered workers; <sup>2</sup>: Total covered workers during the study period (01 July 2010 – 30 June 2015); <sup>3</sup>: ARR = Adjusted Relative Risk,  
 254 adjusted for sex, age group, occupation, and jurisdiction.

255

256 Median time loss was higher for males (9.60 weeks) than females (9.00 weeks) only for LBP.  
257 There did not appear to be an effect of age on time loss for LBP claims, nor were there  
258 substantial differences in time loss between occupations (see Table 2). Median time loss for  
259 LBP claims was highly varied between jurisdictions; LBP claims in NSW lasted a median of  
260 6.77 weeks, compared to 18.80 weeks in Victoria. This same inter-jurisdictional variability  
261 was apparent for limb soft tissue diseases, but less so for limb fractures. There did not appear  
262 to be substantial differences in time loss for LBP claims between IRSAD. However, median  
263 time loss was up to 3.40 weeks greater for cases with missing socioeconomic status. LBP  
264 claims in major cities tended to have greater median time loss than in more remote areas.

Table 2 Time loss and factors affecting time loss

| Variable     | Low Back Pain                          |       | Limb Fracture  |       | Limb Soft Tissue Disease |       |              |
|--------------|----------------------------------------|-------|----------------|-------|--------------------------|-------|--------------|
|              | Median (weeks)                         | IQR   | Median (weeks) | IQR   | Median (weeks)           | IQR   |              |
| Condition    | Limb Fracture                          | -     | -              | 9.21  | 5.07 - 19.30             | -     | -            |
|              | Low Back Pain                          | 9.39  | 3.95 - 30.20   | -     | -                        | -     | -            |
|              | Limb Soft Tissue Disease               | -     | -              | -     | -                        | 14.40 | 5.92 - 40.40 |
| Sex          | Female                                 | 9.00  | 4.00 - 26.38   | 9.43  | 5.19 - 19.17             | 15.40 | 6.20 - 43.20 |
|              | Male                                   | 9.60  | 3.80 - 32.8    | 9.20  | 5.03 - 19.4              | 13.80 | 5.60 - 38.60 |
| Age Group    | 15-24 years                            | 7.00  | 3.39 - 19.14   | 7.30  | 4.40 - 13.20             | 8.80  | 4.00 - 23.81 |
|              | 25-34 years                            | 9.39  | 4.00 - 29.21   | 8.39  | 4.80 - 16.40             | 11.00 | 4.82 - 31.79 |
|              | 35-44 years                            | 10.00 | 4.00 - 34.00   | 9.59  | 5.00 - 20.59             | 13.79 | 5.71 - 40.60 |
|              | 45-55 years                            | 9.80  | 4.00 - 31.40   | 10.20 | 5.40 - 22.51             | 15.60 | 6.40 - 43.79 |
|              | 55+ years                              | 9.50  | 3.80 - 31.80   | 11.14 | 6.00 - 23.60             | 17.20 | 7.00 - 44.80 |
| Occupation   | Managers                               | 10.60 | 4.39 - 37.55   | 8.82  | 4.94 - 18.47             | 14.70 | 6.77 - 45.58 |
|              | Professionals                          | 9.00  | 4.00 - 24.00   | 8.20  | 4.59 - 16.00             | 11.85 | 5.00 - 30.00 |
|              | Technicians and Trades Workers         | 10.40 | 4.00 - 35.81   | 9.00  | 5.00 - 19.40             | 16.33 | 6.20 - 46.79 |
|              | Community and Personal Service Workers | 7.70  | 3.55 - 21.94   | 9.39  | 5.12 - 18.50             | 12.00 | 5.00 - 31.60 |
|              | Clerical and Administrative Workers    | 8.75  | 3.60 - 25.95   | 8.80  | 4.61 - 17.00             | 12.40 | 5.45 - 29.40 |
|              | Sales Workers                          | 10.4  | 4.00 - 38.40   | 9.00  | 4.81 - 19.00             | 20.83 | 7.80 - 76.80 |
|              | Machinery Operators and Drivers        | 10.31 | 4.00 - 35.80   | 10.2  | 5.60 - 22.00             | 15.20 | 6.19 - 42.21 |
|              | Labourers                              | 9.60  | 4.00 - 32.20   | 9.79  | 5.40 - 20.40             | 14.79 | 5.80 - 41.46 |
|              | Missing (n=453)                        | 9.40  | 4.00 - 17.80   | 7.00  | 4.20 - 15.20             | 8.83  | 5.60 - 24.92 |
| Jurisdiction | New South Wales                        | 6.77  | 3.20 - 21.00   | 8.60  | 4.60 - 17.60             | 9.80  | 4.04 - 25.00 |
|              | Victoria                               | 18.8  | 6.39 - 76.80   | 10.79 | 6.19 - 23.40             | 22.39 | 8.60 - 66.40 |
|              | Queensland                             | 7.80  | 3.60 - 19.00   | 8.88  | 5.00 - 18.00             | 10.25 | 4.53 - 23.00 |
|              | South Australia                        | 8.86  | 4.00 - 33.60   | 8.80  | 5.00 - 17.40             | 12.20 | 5.00 - 37.65 |
|              | Western Australia                      | 9.99  | 3.80 - 38.63   | 10.00 | 5.40 - 22.00             | 16.42 | 6.00 - 47.11 |
|              | Tasmania                               | 6.83  | 3.20 - 17.91   | 8.40  | 4.99 - 16.55             | 6.33  | 3.70 - 14.30 |
|              | Northern Territory                     | 11.33 | 4.20 - 34.60   | 9.80  | 4.80 - 21.27             | 16.90 | 5.85 - 32.55 |
|              | Australian Capital Territory Private   | 6.80  | 3.44 - 18.21   | 9.86  | 5.20 - 21.40             | 9.68  | 4.19 - 23.92 |
| IRSAD        | Middle three quintiles                 | 9.60  | 4.00 - 31.80   | 9.61  | 5.20 - 20.60             | 14.20 | 5.39 - 41.21 |
|              | Most advantaged quintile               | 9.20  | 3.81 - 28.80   | 9.32  | 5.06 - 19.20             | 13.40 | 5.50 - 35.33 |
|              | Most disadvantaged quintile            | 8.40  | 3.79 - 24.80   | 8.80  | 5.00 - 17.39             | 12.21 | 5.00 - 32.50 |

|                   |                           |       |              |       |              |       |                |
|-------------------|---------------------------|-------|--------------|-------|--------------|-------|----------------|
|                   | Missing (n=10,016)        | 13.00 | 4.60 - 55.35 | 10.00 | 5.23 - 23.00 | 30.40 | 10.24 - 100.00 |
| Remoteness        | Major Cities of Australia | 9.32  | 3.95 - 29.10 | 9.20  | 5.00 - 19.20 | 13.60 | 5.60 - 36.39   |
|                   | Inner Regional Australia  | 9.00  | 3.80 - 28.49 | 9.20  | 5.12 - 18.80 | 12.80 | 5.00 - 34.00   |
|                   | Outer Regional Australia  | 8.39  | 3.76 - 26.00 | 9.30  | 5.17 - 19.60 | 13.00 | 5.00 - 36.20   |
|                   | Remote Australia          | 6.45  | 3.20 - 18.63 | 9.40  | 5.06 - 18.93 | 12.59 | 5.65 - 31.66   |
|                   | Very Remote Australia     | 8.00  | 3.49 - 27.22 | 9.47  | 4.80 - 17.40 | 11.00 | 3.89 - 30.03   |
|                   | Missing (n=9,886)         | 13.00 | 4.60 - 55.45 | 10.00 | 5.20 - 23.13 | 30.89 | 10.40 - 100.00 |
| Employment Status | Full-time                 | 9.58  | 4.00 - 30.40 | 9.20  | 5.00 - 19.00 | 13.60 | 5.79 - 36.00   |
|                   | Part-time                 | 9.00  | 3.75 - 29.40 | 9.60  | 5.30 - 20.00 | 18.08 | 6.25 - 55.00   |

266

<sup>1</sup>: Adjusted for sex, age group, occupation, jurisdiction, socioeconomic status (SES), remoteness, and employment status – performed using imputed data



267

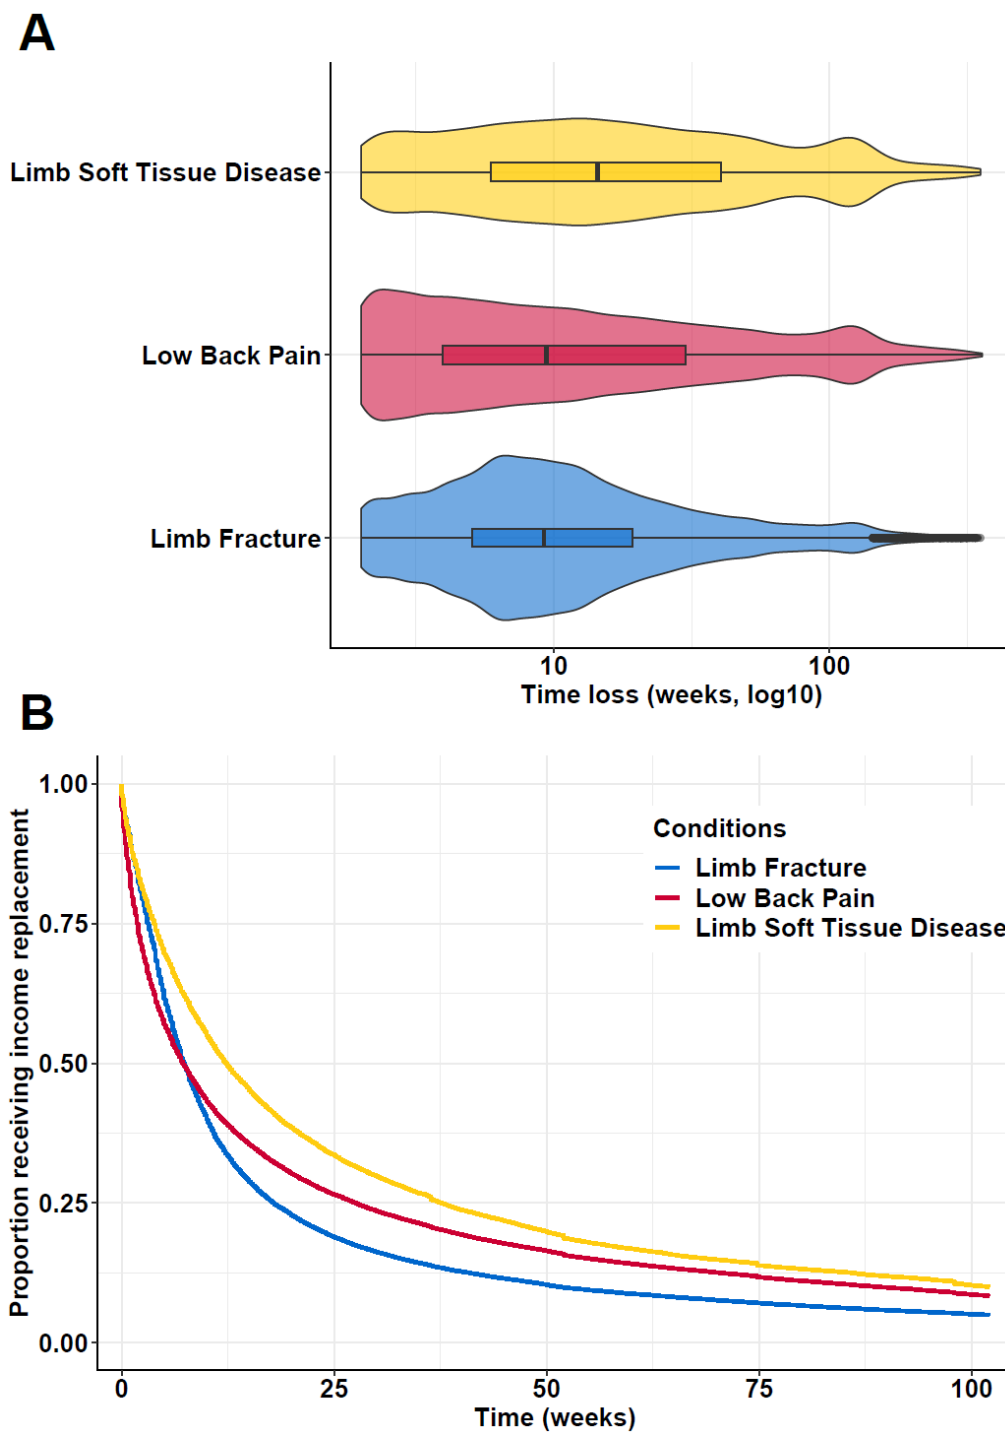

268 *Figure 2 Visual representations of work-related time loss. (A) Violin and box plots*  
269 *demonstrating the distribution of claims by time loss, and median and IQR or time loss, by*  
270 *condition, and; (B) Cumulative survival curve of time loss (conditions are strata).*

271

272 Survival curves plotted based on the Cox model (see Figure 2B **Error! Reference source not**  
 273 **found.**) demonstrated that a larger time loss for LBP claims were more likely to cease than  
 274 limb fracture claims in approximately the six weeks. However, this trend reverses after  
 275 approximately six weeks, with time loss for limb fracture claims more likely to cease after  
 276 this time period. Limb soft tissue disease claims displayed the most shallow survival curve.  
 277 Quantile regression confirmed the patterns observed in the Cox model (see Table 3). LBP  
 278 claims had approximately one week less time loss than limb fracture claims in the 25<sup>th</sup>  
 279 quantile of time loss (coef -1.12, 95%CI -1.20, -1.05). With all covariates set at reference  
 280 values, claims for limb fracture at the 50<sup>th</sup> quantile of time loss were modelled to last 7.46  
 281 weeks. There was no significant difference in time loss between LBP and limb fracture  
 282 claims in the 50<sup>th</sup> quantile (coef -0.14, 95%CI -0.31, 0.03). At the 90<sup>th</sup> quantile time loss  
 283 claims for LBP were 15.62 weeks greater than for limb fractures (95%CI 14.31, 16.94).

284 *Table 3 Quantile regression analysis*

| Quantile | Limb Fracture      | Low Back Pain <sup>2</sup> |                |      | Limb Soft Tissue Disease |                |      |
|----------|--------------------|----------------------------|----------------|------|--------------------------|----------------|------|
|          | Weeks <sup>1</sup> | Coef (weeks) <sup>3</sup>  | 95%CI          | p    | Coef (weeks)             | 95%CI          | p    |
| 10th     | 2.75               | -0.59                      | (-0.63, -0.55) | 0.00 | -0.19                    | (-0.28, -0.11) | 0.00 |
| 25th     | 4.48               | -1.12                      | (-1.2, -1.05)  | 0.00 | 0.22                     | (0.06, 0.38)   | 0.01 |
| 50th     | 7.46               | -0.14                      | (-0.31, 0.03)  | 0.12 | 3.18                     | (2.8, 3.55)    | 0.00 |
| 75th     | 16.22              | 7.02                       | (6.42, 7.61)   | 0.00 | 9.63                     | (8.6, 10.65)   | 0.00 |
| 90th     | 48.53              | 15.62                      | (14.31, 16.94) | 0.00 | 12.29                    | (10.87, 13.71) | 0.00 |

285 <sup>1</sup>: Calculated with all covariates set at reference values; <sup>2</sup>: Adjusted for sex, age group,  
 286 occupation, jurisdiction, SES, remoteness, and employment status; <sup>3</sup>: coefficient and  
 287 confidence interval are interpreted as additional / less weeks' time loss.

## 288 DISCUSSION

289 This study aimed to determine the incidence and duration of working time loss due to work-  
 290 related LBP in Australia compared with other common work-related musculoskeletal  
 291 conditions. There was a greater incidence of LBP time loss claims compared to limb fracture  
 292 and limb soft tissue disease claims. The relative risk of claiming for LBP was greater than

293 claiming for limb fracture even after adjustment for demographic, occupational and injury  
294 characteristics. Time loss for LBP and limb fractures were relatively similar, with claims for  
295 limb soft tissue disease lasting longer. Distinct patterns of fluctuating likelihood of time loss  
296 emerged for LBP and limb fracture claims. Claims for LBP were significantly more likely to  
297 be resolved in the early phase (10<sup>th</sup> and 25<sup>th</sup> quantiles) than claims for limb fracture, but  
298 significantly less likely in the later phase (75<sup>th</sup> and 90<sup>th</sup> quantiles).

299 There were distinct patterns of time loss for each condition, despite similarities in median  
300 time loss. With the distribution of time loss clustered around the median (9.21 weeks), time  
301 loss for limb fracture claims appeared to follow what would be considered a typical clinical  
302 timeline of recovery for fracture healing.<sup>23</sup> A large proportion of LBP claims appeared to  
303 have minimal time loss. This is promising, in that work-related LBP might follow expected  
304 recovery patterns for the majority of LBP cases – a typically positive prognosis and short-  
305 term disability.<sup>3</sup> Visual patterns of time loss were confirmed statistically in the quantile  
306 regression model. LBP claims were more likely than limb fracture claims to resolve within  
307 seven weeks, and to persist for periods beyond seven weeks. The shift in likelihood of time  
308 loss duration may be a combination of factors from both conditions; workers with LBP may  
309 be more likely to return to work (i.e., time loss has ceased) as their pain has resolved quickly,  
310 with workers with limb fracture more likely to return to work after their fracture has healed  
311 sufficiently to resume activities. However, without further information it can only be  
312 hypothesised that this is the case.

313 The interaction between each condition and policies and practices may also contribute to the  
314 fluctuating time loss duration patterns observed in this analysis. For example, a practice such  
315 as diagnostic imaging may contribute to variable outcomes for each condition. Imaging has  
316 minimal diagnostic merit in the acute phase of LBP, and may be detrimental to a return to  
317 work for compensated workers.<sup>37, 38</sup> In the case of limb fractures however, imaging is an

318 essential and useful tool for diagnosis, and may be used to indicate that a worker is capable of  
319 returning to work. Other policy features may contribute to the observations made in this study.  
320 For example, both LBP and limb soft tissue disease claims observed a notable cluster of  
321 distribution of claims lasting approximately 100 weeks. This is unlikely to translate to  
322 recovery of large portion of claimants at this point. Instead, it is more likely due to the  
323 cessation of benefits in short-tail workers' compensation schemes, such as Victoria.<sup>10</sup>

324 The higher rate of LBP in older workers aligns with previous research.<sup>39</sup> However, the  
325 incidence of claims for work-related LBP does not necessarily reflect the incidence of work-  
326 related LBP. For example, lower claim rates in one jurisdiction do not necessarily mean that  
327 it is safer, and may instead indicate differences in system eligibility criteria, cultural or local  
328 norms, or health literacy.<sup>24</sup> The higher rate of claims for LBP in more physically demanding  
329 occupations may indicate a link between physically demanding work and LBP. However, this  
330 link has previously been debated elsewhere.<sup>40</sup> It may be that workers are more likely to lodge  
331 a claim for LBP if they have a physically demanding occupation because LBP limits their  
332 ability to perform their normal duties. Finally, the effect of policy differences on workers'  
333 compensation claims rates between workers' compensation schemes across Australia on time  
334 loss has previously been reported and is reflected in these findings.<sup>24</sup>

335 This study benefited from a large, population-wide sample. The use of robust and novel  
336 statistical methods provides new insights into time loss in this population. The analytic  
337 techniques used provide new prognostic insight in the return to work setting, by  
338 understanding the likelihood of time loss duration associated with each of the three included  
339 conditions at different times, rather than simply the pooled likelihood of return to work.

340 There were also several limitations to this study. Firstly, there was missing data for some  
341 variables, and denominator data for all variables was not available.

342 The NDS is a secondary dataset that, despite extensive data cleaning and quality assurance,  
343 may contain errors. For example, it was possible that some conditions included in the data  
344 were misclassified. Injury classification (such as nature or location) is performed by workers'  
345 compensation schemes, and may be subject to data entry errors. Several implausible  
346 conditions (e.g., tennis elbow in the hip) were identified and removed during data cleaning.  
347 Higher-level TOOCS codes (e.g., soft tissue diseases) were used to absorb this possible  
348 misclassification. However, this may have led to a cohort definition that was too clinically  
349 broad; an upper limb fracture and lower limb fracture are likely to have different effects on a  
350 person's mobility. However, we believe that even with such limitations the analyses captured  
351 the overall important trends.

352 Finally, most statistical relationships were significant despite some relatively small effect  
353 sizes. This was likely due to the large sample size available for this study, and while not  
354 necessarily a limitation, future analyses may benefit from sub-sampling to ensure effects  
355 remain significant at even smaller sample sizes.

356 Future research should consider that time loss should not be viewed a single fixed value, but  
357 a fluctuating concept. Results presented here demonstrated that the likelihood of return to  
358 work may change with time depending on condition, and other recent research has  
359 demonstrated that gender has a similar time-dependent effect on working time loss outcomes.

360 As in the general population, LBP is a prevalent musculoskeletal symptom in compensated  
361 Australian workers. Time loss due to claims for LBP is relatively similar to claims for limb  
362 fractures. However, changes in the likelihood of time loss duration for LBP relative to limb  
363 fracture claims varies depending on the duration of the claim. These findings should reiterate  
364 to clinicians, claims managers, and workers' compensation schemes the importance of  
365 returning a worker to work as soon as practicable, to avoid future delays and challenges.

366 **Competing interests:** The authors declare no competing interests.

367 **Source(s) of support:** Mr Di Donato receives a Research Training Program (RTP)  
368 Scholarship Stipend from the Australian Government. Professor Buchbinder is supported by  
369 an Australian National Health and Medical Research Council (NHMRC) Senior Principal  
370 Research Fellowship. Professor Collie is supported by an Australian Research Council (ARC)  
371 Discovery Project Grant (DP190102473) and Future Fellowship (FT190100218).

372 **Acknowledgements:** This paper uses data supplied by Safe Work Australia and has been  
373 compiled in collaboration with state, territory and Commonwealth workers' compensation  
374 regulators. The views expressed are the responsibility of the author(s) and are not necessarily  
375 the views of Safe Work Australia or the state, territory and Commonwealth workers'  
376 compensation regulators.

## 377 **REFERENCES**

- 378 1. Australian Institute of Health and Welfare (AIHW). Australian Burden of Disease Study:  
379 impact and causes of illness and death in Australia 2015. Australian Burden of  
380 Disease series no 19. Canberra: AIHW, 2019.
- 381 2. GBD 2017 Disease and Injury Incidence and Prevalence Collaborators. Global, regional,  
382 and national incidence, prevalence, and years lived with disability for 354 diseases  
383 and injuries for 195 countries and territories, 1990-2017: a systematic analysis for the  
384 Global Burden of Disease Study 2017. *Lancet (London, England)*  
385 2018;392(10159):1789-858. doi: 10.1016/s0140-6736(18)32279-7 [published Online  
386 First: 2018/11/30]
- 387 3. Hartvigsen J, Hancock MJ, Kongsted A, et al. What low back pain is and why we need to  
388 pay attention. *The Lancet* 2018 doi: 10.1016/S0140-6736(18)30480-X

- 389 4. Foster NE, Anema JR, Cherkin D, et al. Prevention and treatment of low back pain:  
390 evidence, challenges, and promising directions. *The Lancet* 2018 doi: 10.1016/S0140-  
391 6736(18)30489-6
- 392 5. Australian Institute of Health and Welfare (AIHW). Back Problems - What role do GPs  
393 play in treating back problems? Canberra: AIHW; 2017 [Available from:  
394 [https://www.aihw.gov.au/reports/arthritis-other-musculoskeletal-conditions/back-](https://www.aihw.gov.au/reports/arthritis-other-musculoskeletal-conditions/back-problems/what-role-do-gps-play-in-treating-back-problems)  
395 [problems/what-role-do-gps-play-in-treating-back-problems](https://www.aihw.gov.au/reports/arthritis-other-musculoskeletal-conditions/back-problems/what-role-do-gps-play-in-treating-back-problems) accessed 15 May 2018.
- 396 6. Dunn KM, Hestbaek L, Cassidy JD. Low back pain across the life course. *Best practice &*  
397 *research Clinical rheumatology* 2013;27(5):591-600. doi: 10.1016/j.berh.2013.09.007  
398 [published Online First: 2013/12/10]
- 399 7. Froud R, Patterson S, Eldridge S, et al. A systematic review and meta-synthesis of the  
400 impact of low back pain on people's lives. *BMC Musculoskelet Disord* 2014;15:50.  
401 doi: 10.1186/1471-2474-15-50 [published Online First: 2014/02/25]
- 402 8. Anema JR, Schellart AJM, Cassidy JD, et al. Can cross country differences in return-to-  
403 work after chronic occupational back pain be explained? An exploratory analysis on  
404 disability policies in a six country cohort study. *Journal of occupational rehabilitation*  
405 2009;19(4):419-26. doi: <http://dx.doi.org/10.1007/s10926-009-9202-3>
- 406 9. Collie A, Di Donato M, Iles R. Work Disability in Australia: An Overview of Prevalence,  
407 Expenditure, Support Systems and Services. *Journal of occupational rehabilitation*  
408 2018 doi: 10.1007/s10926-018-9816-4
- 409 10. Safe Work Australia (SWA). Comparison of workers' compensation arrangements in  
410 Australian and New Zealand 2017. Canberra, Australia: SWA, 2017.
- 411 11. Lane TJ, Collie A, Hassani-Mahmooei B. Work-related injury and illness in Australia,  
412 2004 to 2014. What is the incidence of work-related conditions and their impact on

- 413 time lost from work by state and territory, age, gender and injury type? . Melbourne:  
414 ISCRR 118-0616-R02, 2016.
- 415 12. Safe Work Australia (SWA). Australian Workers' Compensation Statistics 2016-17.  
416 Canberra: Safe Work Australia, 2018.
- 417 13. Shraim M, Cifuentes M, Willetts JL, et al. Length of Disability and Medical Costs in Low  
418 Back Pain: Do State Workers' Compensation Policies Make a Difference? *Journal of*  
419 *occupational and environmental medicine* 2015;57(12):1275-83. doi:  
420 10.1097/jom.0000000000000593 [published Online First: 2015/10/23]
- 421 14. Steenstra IA, Busse JW, Tolusso D, et al. Predicting time on prolonged benefits for  
422 injured workers with acute back pain. *Journal of occupational rehabilitation*  
423 2015;25(2):267-78. doi: 10.1007/s10926-014-9534-5 [published Online First:  
424 2014/08/29]
- 425 15. Steenstra IA, Munhall C, Irvin E, et al. Systematic Review of Prognostic Factors for  
426 Return to Work in Workers with Sub Acute and Chronic Low Back Pain. *Journal of*  
427 *occupational rehabilitation* 2017;27(3):369-81. doi: 10.1007/s10926-016-9666-x  
428 [published Online First: 2016/09/21]
- 429 16. Safe Work Australia (SWA). National Data Set for Compensation-based Statistics, Third  
430 Edition, revision 1. Third ed. Canberra, Australia: Safe Work Australia, 2004.
- 431 17. International Labour Organization (ILO). World Social Protection Report 2017-19 -  
432 Universal social protection to achieve the Sustainable Development Goals. Geneva,  
433 Switzerland: ILO, 2017.
- 434 18. Lippel K, Lötters F. Public Insurance Systems: A Comparison of Cause-Based and  
435 Disability-Based Income Support Systems. In: Loisel P, Anema JR, eds. Handbook of  
436 Work Disability: Prevention and Management. New York, NY: Springer New York  
437 2013:183-202.



- 438 19. Gray SE, Collie A. The nature and burden of occupational injury among first responder  
439 occupations: A retrospective cohort study in Australian workers. *Injury*  
440 2017;48(11):2470-77. doi: 10.1016/j.injury.2017.09.019 [published Online First:  
441 2017/10/02]
- 442 20. Gray SE, Collie A. Comparing time off work after work-related mental health conditions  
443 across Australian workers' compensation systems: a retrospective cohort study.  
444 *Psychiatry, Psychology and Law* 2018:1-18. doi: 10.1080/13218719.2018.1473176
- 445 21. Australian Safety and Compensation Council (ASCC). Type of Occurrence Classification  
446 System (Third edition, revision one). Canberra, Australia: ASCC, 2008.
- 447 22. National Institute for Health and Care Excellence (NICE). Low back pain and sciatica in  
448 over 16s: assessment and management. London, UK: NICE, 2016.
- 449 23. National Institute for Health and Care Excellence (NICE). Fractures (non-complex):  
450 assessment and management. NICE Guideline NG38. London: NICE, 2016.
- 451 24. Collie A, Lane TJ, Hassani-Mahmoei B, et al. Does time off work after injury vary by  
452 jurisdiction? A comparative study of eight Australian workers' compensation systems.  
453 *BMJ Open* 2016;6(5)
- 454 25. Australian Bureau of Statistics (ABS). Australian and New Zealand standard  
455 classification of occupations, 2013, Version 1.2. Canberra: Australian Bureau of  
456 Statistics, 2013.
- 457 26. Australian Bureau of Statistics (ABS). 2006 RA from 2006 POA Correspondence.  
458 Australian Standard Geographical Classification (ASGC) Remoteness Area  
459 Correspondences. Canberra: Australian Bureau of Statistics, 2011.
- 460 27. Australian Bureau of Statistics (ABS). Postal Area, Indexes, SEIFA 2011. Census of  
461 Population and Housing: Socio-Economic Indexes for Areas (SEIFA), Australia, 2011.  
462 Canberra: Australian Bureau of Statistics, 2013.

- 463 28. Department of Health and Aged Care. Measuring Remoteness: Accessibility/Remoteness  
464 Index of Australia (ARIA) Revised Edition. Occasional Papers: New Series Number  
465 14. Canberra: Department of Health and Aged Care, 2001.
- 466 29. mice: Multivariate Imputation by Chained Equations. R package version 3.5.0. [program],  
467 2019.
- 468 30. Bellera CA, MacGrogan G, Debled M, et al. Variables with time-varying effects and the  
469 Cox model: Some statistical concepts illustrated with a prognostic factor study in  
470 breast cancer. *BMC medical research methodology* 2010;10(1):20. doi: 10.1186/1471-  
471 2288-10-20
- 472 31. Webb P, Bain C, Page A. Essential epidemiology : an introduction for students and health  
473 professionals. Third edition. ed: Cambridge, United Kingdom 2017.
- 474 32. Koenker R. Quantile Regression: 40 Years On. *Annual Review of Economics*  
475 2017;9(1):155-76. doi: 10.1146/annurev-economics-063016-103651
- 476 33. Koenker R, Hallock KF. Quantile Regression. *The Journal of Economic Perspectives*  
477 2001;15(4):143-56.
- 478 34. Fan ZJ, Foley MP, Rauser E, et al. Effects of residential location and work-commuting on  
479 long-term work disability. *Journal of occupational rehabilitation* 2013;23(4):610-20.  
480 doi: 10.1007/s10926-013-9424-2 [published Online First: 2013/02/13]
- 481 35. R: A language and environment for statistical computing. [program]. Vienna, Austria: R  
482 Foundation for Statistical Computing, 2017.
- 483 36. Microsoft Visual Studio 2017 [program]. Redmond, Washington: Microsoft Corporation,  
484 2018.
- 485 37. Brinjikji W, Luetmer PH, Comstock B, et al. Systematic literature review of imaging  
486 features of spinal degeneration in asymptomatic populations. *AJNR American journal*

- 487            *of neuroradiology* 2015;36(4):811-6. doi: 10.3174/ajnr.A4173 [published Online First:  
488            2014/11/29]
- 489    38. Webster BS, Bauer AZ, Choi Y, et al. Iatrogenic consequences of early magnetic  
490            resonance imaging in acute, work-related, disabling low back pain. *Spine*  
491            2013;38(22):1939-46. doi: 10.1097/BRS.0b013e3182a42eb6 [published Online First:  
492            2013/07/26]
- 493    39. Macpherson RA, Lane TJ, Collie A, et al. Age, sex, and the changing disability burden of  
494            compensated work-related musculoskeletal disorders in Canada and Australia. *BMC*  
495            *Public Health* 2018;18(1):758. doi: 10.1186/s12889-018-5590-7
- 496    40. Kwon BK, Roffey DM, Bishop PB, et al. Systematic review: occupational physical  
497            activity and low back pain. *Occupational medicine (Oxford, England)*  
498            2011;61(8):541-8. doi: 10.1093/occmed/kqr092 [published Online First: 2011/07/06]  
499
